# Supplementary material for: Caucasian Dragonheads: Phenolic Compounds, Polysaccharides, and Bioactivity of Dracocephalum austriacum and Dracocephalum botryoides
Source: MDPI journal article supplement (doi:10.3390/plants11162126), 2022-08-15
Supplement: s1 [file s1]

Supplementary Material

# Caucasian Dragonheads: Phenolic Compounds, Polysaccharides, and Bioactivity of *Dracocephalum austriacum* and *Dracocephalum botryoides*

Nina I. Kashchenko<sup>1,\*</sup>, Gunay S. Jafarova <sup>2</sup>, Javanshir I. Isaev <sup>2</sup>, Daniil N. Olennikov <sup>1</sup>, Nadezhda K. Chirikova <sup>3</sup>

<sup>1</sup> Laboratory of Medical and Biological Research, Institute of General and Experimental Biology, Siberian Division, Russian Academy of Science, 670047 Ulan-Ude, Russia; olennikovdn@mail.ru (D.N.O.)

<sup>2</sup> Department of Pharmacognosy, Azerbaijan Medical University, Anvar Gasimzade Street 14, Baku AZ1022, Azerbaijan; jafar.gunay.92@gmail.com (G.S.J.), isayev.cavanshir@amu.edu.az (J.I.I.)

<sup>3</sup> Department of Biochemistry and Biotechnology, North-Eastern Federal University, 58 Belinsky Street, 677027 Yakutsk, Russia; hofnung@mail.ru

\* Correspondence: ninkk@mail.ru; Tel.: +8-983-421-73-40

## Content

**Table S1.** Reference standards used for the qualitative and quantitative analysis by HPLC-PDA-ESI-QQQ-MS assays.

**Table S2.** Regression equations, correlation coefficients ( $r^2$ ), standard deviation ( $S_{yx}$ ), limits of detection (LOD), limits of quantification (LOQ) and linear ranges for 34 reference standards.

**Table S1.** Reference standards used for the qualitative and quantitative analysis by HPLC-PDA-ESI-QQQ-MS assays.

| No in Table 1 | Compound                                        | Purity (≥), % | Manufacturer (Cat. No.) *                                      | Used for Qualitative (QL) and Quantitative (QT) Analysis of Compounds (No in Table 1) |
|---------------|-------------------------------------------------|---------------|----------------------------------------------------------------|---------------------------------------------------------------------------------------|
| 2             | Caftaric acid                                   | 97            | Sigma (15029)                                                  | QL: 2. QT: 2.                                                                         |
| 3             | Danshensu                                       | 98            | BioCrick (BCN8513)                                             | QL: 3. QT: 1, 3, 4.                                                                   |
| 5             | 4-O-Caffeoylquinic acid                         | 98            | Sigma (65969)                                                  | QL: 5. QT: 5.                                                                         |
| 8             | 4-Hydroxybenzoic acid 4-O-glucoside             | 98            | PlantMetaChem (C6201-H043)                                     | QL: 8. QT: 8, 16.                                                                     |
| 9             | Eriodictyol 7-O-rutinoside                      | 98            | Sigma (45714)                                                  | QL: 9. QT: 9.                                                                         |
| 10            | Luteolin 7,4'-di-O-rutinoside                   | 95            | Lab collection/isolated from <i>D. palmatum</i> [26]           | QL: 10. QT: 10.                                                                       |
| 11            | 5-O-Caffeoylquinic acid                         | 95            | Sigma (91213)                                                  | QL: 11. QT: 11.                                                                       |
| 12            | 3-O-Caffeoylquinic acid                         | 95            | Sigma (PHL89175)                                               | QL: 12. QT: 12.                                                                       |
| 14            | 1,3-Di-O-caffeoylquinic acid                    | 98            | Sigma (D8196)                                                  | QL: 14. QT: 14.                                                                       |
| 15            | Caffeic acid                                    | 98            | Sigma (C0625)                                                  | QL: 15. QT: 13, 15.                                                                   |
| 17            | Luteolin 7-O-rutinoside-4'-O-glucoside          | 95            | Lab collection/isolated from <i>D. palmatum</i> [26]           | QL: 17. QT: 17.                                                                       |
| 18            | Eriodictyol 7-O-glucoside                       | 99            | Sigma (19474)                                                  | QL: 18. QT: 18.                                                                       |
| 19            | Luteolin 7-O-rutinoside                         | 95            | Sigma (SMB00200)                                               | QL: 19. QT: 19.                                                                       |
| 20            | Luteolin 7-O-glucoside                          | 98            | Extrasynthese (1126 S)                                         | QL: 20. QT: 6, 7, 20, 21, 34.                                                         |
| 22            | Luteolin 4'-O-glucoside                         | 95            | Extrasynthese (1412 S)                                         | QL: 22. QT: 22.                                                                       |
| 23            | Naringenin 7-O-rutinoside                       | 98            | BioCrick (BCN6300)                                             | QL: 23. QT: 23.                                                                       |
| 24            | Luteolin 3'-O-glucoside                         | 95            | PhytoLab (85840)                                               | QL: 24. QT: 24.                                                                       |
| 25            | Apigenin 7-O-rutinoside                         | 98            | Extrasynthese (1121 S)                                         | QL: 25. QT: 25.                                                                       |
| 26            | Naringenin 7-O-glucoside                        | 95            | Sigma (SMB00076)                                               | QL: 26. QT: 26.                                                                       |
| 27            | Luteolin 7-O-(6''-acetyl)-glucoside             | 95            | Lab collection/isolated from <i>D. palmatum</i> [27]           | QL: 27. QT: 27.                                                                       |
| 28            | Apigenin 7-O-glucoside                          | 97            | Sigma (44692)                                                  | QL: 28. QT: 45, 28.                                                                   |
| 30            | Rosmarinic acid                                 | 99            | Extrasynthese (4957 S)                                         | QL: 30. QT: 30, 47.                                                                   |
| 32            | Lithospermic acid B                             | 98            | BioCrick (BCC8249)                                             | QL: 32. QT: 31, 32.                                                                   |
| 33            | Lithospermic acid A                             | 98            | BioCrick (BCN5369)                                             | QL: 33. QT: 33.                                                                       |
| 36            | Eriodictyol                                     | 95            | Sigma (74565)                                                  | QL: 36. QT: 36.                                                                       |
| 37            | Luteolin                                        | 98            | Sigma (L9283)                                                  | QL: 37. QT: 37.                                                                       |
| 40            | Naringenin                                      | 95            | Sigma (N5893)                                                  | QL: 40. QT: 40.                                                                       |
| 41            | Apigenin                                        | 95            | Sigma (10798)                                                  | QL: 41. QT: 41.                                                                       |
| 42            | Apigenin 7-O-(4''-malonyl-6''-acetyl)-glucoside | 95            | Lab collection/isolated from <i>Matricaria chamomilla</i> [56] | QL: 42. QT: 42.                                                                       |
| 43            | Acacetin 7-O-glucoside                          | 95            | ChemFaces (CFN92764)                                           | QL: 43. QT: 29, 35, 43.                                                               |
| 44            | Apigenin 7-O-(6''-O-acetyl)-glucoside           | 95            | Lab collection/isolated from <i>D. palmatum</i> [27]           | QL: 44. QT: 44.                                                                       |
| 46            | Schizotenuin A                                  | 95            | Lab collection/isolated from <i>Nepeta multifida</i> [39]      | QL: 46. QT: 46.                                                                       |
| 50            | Nepetamultin A                                  | 95            | Lab collection/isolated from <i>N. multifida</i> [39]          | QL: 50. QT: 48-50.                                                                    |
|               | Benzoic acid                                    | 99            | Sigma (242381)                                                 | QT: 38, 39.                                                                           |

\* Manufacturers list: BioCrick Co. Ltd. (Chengdu Tianfu, Sichuan, PRC); ChemFaces (Wuhan, Hubei, PRC); Extrasynthese (Lyon, France); PhytoLab GmbH & Co. KG (Vestenbergsgreuth, Germany); Sigma-Aldrich (St. Louis, MO, USA).

**Table S2.** Regression equations, correlation coefficients ( $r^2$ ), standard deviation ( $S_{yx}$ ), limits of detection (LOD), limits of quantification (LOQ) and linear ranges for 34 reference standards.

| Compound                                                 | Ionization <sup>a</sup> | CE <sup>b</sup><br>(eV) | Regression equation <sup>c</sup> |                | $r^2$  | $S_{yx}$             | LOD/LOQ<br>( $\mu\text{g/mL}$ ) | Linear range<br>( $\mu\text{g/mL}$ ) |
|----------------------------------------------------------|-------------------------|-------------------------|----------------------------------|----------------|--------|----------------------|---------------------------------|--------------------------------------|
|                                                          |                         |                         | a                                | $b \cdot 10^6$ |        |                      |                                 |                                      |
| Caftaric acid                                            | N                       | -20                     | 1.4238                           | -0.0891        | 0.9901 | $7.33 \cdot 10^{-2}$ | 0.17/0.52                       | 0.6–100.0                            |
| Danshensu                                                | N                       | -20                     | 3.022                            | -0.769         | 0.9990 | $1.02 \cdot 10^{-2}$ | 0.011/0.03                      | 0.03–250.0                           |
| 4- <i>O</i> -Caffeoylquinic acid                         | N                       | -15                     | 0.9217                           | -0.0437        | 0.9982 | $3.94 \cdot 10^{-2}$ | 0.14/0.43                       | 0.5–100.0                            |
| 4-Hydroxybenzoic acid 4- <i>O</i> -glucoside             | N                       | -20                     | 1.5379                           | -0.6220        | 0.9990 | $0.99 \cdot 10^{-2}$ | 0.02/0.06                       | 0.10–250.0                           |
| Eriodictyol 7- <i>O</i> -rutinoside                      | N                       | -20                     | 4.1069                           | -0.5637        | 0.9989 | $0.77 \cdot 10^{-2}$ | 0.006/0.02                      | 0.02–400.0                           |
| Luteolin 7,4'-di- <i>O</i> -rutinoside                   | N                       | -20                     | 2.0384                           | -0.3640        | 0.9975 | $2.02 \cdot 10^{-2}$ | 0.03/0.10                       | 0.10–350                             |
| 5- <i>O</i> -Caffeoylquinic acid                         | N                       | -15                     | 0.9406                           | -0.0497        | 0.9973 | $5.18 \cdot 10^{-2}$ | 0.18/0.55                       | 0.6–100.0                            |
| 3- <i>O</i> -Caffeoylquinic acid                         | N                       | -15                     | 0.9320                           | -0.0523        | 0.9991 | $4.14 \cdot 10^{-2}$ | 0.15/0.44                       | 0.5–100.0                            |
| 1,3-Di- <i>O</i> -caffeoylquinic acid                    | N                       | -20                     | 1.8535                           | 0.0761         | 0.9989 | $4.55 \cdot 10^{-2}$ | 0.08/0.25                       | 0.3–100.0                            |
| Caffeic acid                                             | N                       | -20                     | 2.4493                           | -0.0938        | 0.9989 | $1.85 \cdot 10^{-2}$ | 0.03/0.08                       | 0.1–100.0                            |
| Luteolin 7- <i>O</i> -rutinoside-4'- <i>O</i> -glucoside | N                       | -20                     | 7.833                            | -1.442         | 0.9984 | $2.63 \cdot 10^{-2}$ | 0.011/0.03                      | 0.04–500.0                           |
| Eriodictyol 7- <i>O</i> -glucoside                       | N                       | -20                     | 4.9634                           | -0.5047        | 0.9972 | $0.63 \cdot 10^{-2}$ | 0.004/0.01                      | 0.01–400.0                           |
| Luteolin 7- <i>O</i> -rutinoside                         | N                       | -25                     | 2.5078                           | -0.6342        | 0.9991 | $0.96 \cdot 10^{-2}$ | 0.01/0.03                       | 0.04–400.0                           |
| Luteolin 7- <i>O</i> -glucoside                          | N                       | -20                     | 7.064                            | -1.533         | 0.9992 | $1.92 \cdot 10^{-2}$ | 0.009/0.003                     | 0.003–500.0                          |
| Luteolin 4'- <i>O</i> -glucoside                         | N                       | -20                     | 1.4689                           | -0.3641        | 0.9990 | $5.69 \cdot 10^{-2}$ | 0.12/0.38                       | 0.40–400.0                           |
| Naringenin 7- <i>O</i> -rutinoside                       | N                       | -20                     | 2.6340                           | -0.2411        | 0.9973 | $2.74 \cdot 10^{-2}$ | 0.03/0.10                       | 0.10–350.0                           |
| Luteolin 3'- <i>O</i> -glucoide                          | N                       | -20                     | 1.1541                           | -0.4691        | 0.9987 | $1.06 \cdot 10^{-2}$ | 0.03/0.10                       | 0.10–350.0                           |
| Apigenin 7- <i>O</i> -rutinoside                         | N                       | -25                     | 1.9634                           | -0.7458        | 0.9963 | $2.59 \cdot 10^{-2}$ | 0.04/0.14                       | 0.20–350.0                           |
| Naringenin 7- <i>O</i> -glucoside                        | N                       | -20                     | 1.2716                           | -0.7389        | 0.9897 | $9.14 \cdot 10^{-2}$ | 0.23/0.72                       | 0.80–400.0                           |
| Luteolin 7- <i>O</i> -(6''-acetyl)-glucoside             | N                       | -25                     | 7.804                            | -1.202         | 0.9944 | $3.04 \cdot 10^{-2}$ | 0.012/0.04                      | 0.04–250.0                           |
| Apigenin 7- <i>O</i> -glucoside                          | N                       | -20                     | 5.802                            | -0.804         | 0.9990 | $1.14 \cdot 10^{-2}$ | 0.007/0.02                      | 0.02–500.0                           |
| Rosmarinic acid                                          | N                       | -20                     | 1.9610                           | -0.5271        | 0.9993 | $0.94 \cdot 10^{-2}$ | 0.02/0.05                       | 0.05–250.0                           |
| Lithospermic acid B                                      | N                       | -25                     | 1.706                            | -0.485         | 0.9963 | $0.79 \cdot 10^{-2}$ | 0.015/0.05                      | 0.05–250.0                           |
| Lithospermic acid A                                      | N                       | -25                     | 1.933                            | -0.562         | 0.9954 | $0.83 \cdot 10^{-2}$ | 0.014/0.04                      | 0.04–250.0                           |
| Eriodictyol                                              | N                       | -20                     | 3.6748                           | -0.7069        | 0.9987 | $0.90 \cdot 10^{-2}$ | 0.008/0.02                      | 0.02–400.0                           |
| Luteolin                                                 | N                       | -15                     | 7.064                            | -1.533         | 0.9992 | $1.92 \cdot 10^{-2}$ | 0.009/0.03                      | 0.03–500.0                           |
| Naringenin                                               | N                       | -20                     | 1.1105                           | -0.3211        | 0.9937 | $4.18 \cdot 10^{-2}$ | 0.12/0.38                       | 0.40–400.0                           |
| Apigenin                                                 | N                       | -25                     | 5.206                            | -1.407         | 0.9992 | $1.52 \cdot 10^{-2}$ | 0.010/0.03                      | 0.03–500.0                           |
| Apigenin                                                 | N                       | -20                     | 1.9871                           | -0.6871        | 0.9984 | $5.63 \cdot 10^{-2}$ | 0.09/0.28                       | 0.40–400.0                           |
| 7- <i>O</i> -(4''-malonyl-6''-acetyl)-glucoside          |                         |                         |                                  |                |        |                      |                                 |                                      |
| Acacetin 7- <i>O</i> -glucoside                          | N                       | -25                     | 1.1492                           | -0.6010        | 0.9980 | $4.68 \cdot 10^{-2}$ | 0.14/0.41                       | 0.50–400.0                           |
| Apigenin 7- <i>O</i> -(6''- <i>O</i> -acetyl)-glucoside  | N                       | -30                     | 5.534                            | -0.705         | 0.9953 | $2.01 \cdot 10^{-2}$ | 0.012/0.04                      | 0.04–250.0                           |
| Schizotenuin A                                           | N                       | -25                     | 2.733                            | -0.637         | 0.9991 | $0.52 \cdot 10^{-2}$ | 0.006/0.02                      | 0.02–250.0                           |
| Nepetamultin A                                           | N                       | -25                     | 2.536                            | -0.473         | 0.9962 | $0.64 \cdot 10^{-2}$ | 0.008/0.03                      | 0.03–250.0                           |
| Benzoic acid                                             | N                       | -10                     | 1.5379                           | -0.6220        | 0.9990 | $0.99 \cdot 10^{-2}$ | 0.02/0.06                       | 0.10–250.0                           |

<sup>a</sup> Ionization mode: N – negative. <sup>b</sup> CE – collision energy. <sup>c</sup> Regression equation:  $y = a \cdot x + b$
